# Supplementary material
Source: PubMed Central journal article supplement (PMC5075097)
Supplement: AAC.01481-16_zac011165698so1.pdf [file AAC.01481-16_zac011165698so1.pdf]

Table S1. MICs for *E. coli* strains UTI89 and W3110

| Antibiotic     | MICs ( $\mu\text{g/ml}$ ) |       |
|----------------|---------------------------|-------|
|                | UTI89                     | W3110 |
| Ampicillin     | 8                         | 8     |
| Ofloxacin      | 0.06                      | 0.06  |
| Gentamicin     | 4                         | 2     |
| Nitrofurantoin | 8                         | 8     |
| SXT            | 2                         | 2     |

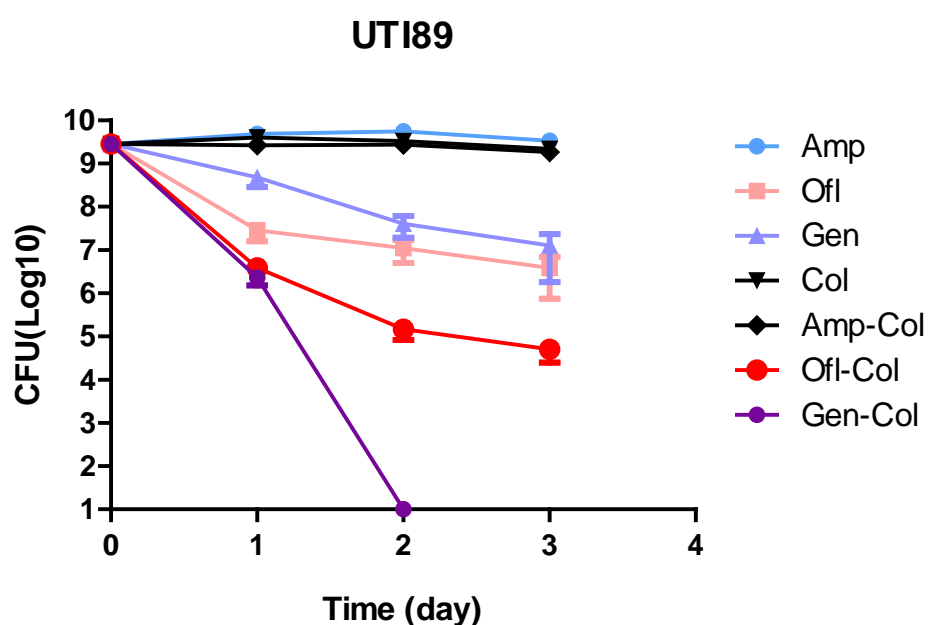

**Figure S1. Colistin enhances the activity of other antibiotics against UTI89 stationary phase culture.** *E. coli* strain UTI89 was grown overnight to stationary phase followed by addition of antibiotics to the culture directly. Colistin was used at 10  $\mu\text{g/ml}$ , ampicillin, ofloxacin and gentamicin were used at 100, 5 and 20  $\mu\text{g/ml}$ , respectively. At different times of drug exposure, the viability of the bacteria was determined by CFU count. Amp: ampicillin, OfI: ofloxacin, Gen: gentamicin, Col: colistin. The data represent average values of three independent biological replicates plus and minus standard errors.
